# Supplementary material for: Sunlight-Active BiOI Photocatalyst as an Efficient Adsorbent for the Removal of Organic Dyes and Antibiotics from Aqueous Solutions
Source: MDPI journal article supplement (doi:10.3390/molecules26185624), 2021-09-16
Supplement: s1 [file s1]

## Supplementary Materials

# Sunlight-Active BiOI Photocatalyst as an Efficient Adsorbent for the Removal of Organic Dyes and Antibiotics from Aqueous Solutions

Teerapong Narenuch, Teeradech Senasu, Tammanoon Chankhanittha and Suwat Nanan\*

Materials Chemistry Research Center, Department of Chemistry and Center of Excellence for Innovation in Chemistry (PERCH-CIC), Faculty of Science, Khon Kaen University, Khon Kaen 40002, Thailand

\* Correspondence: suwatna@kku.ac.th; Tel: +66-43-202222-41 (ext. 12370); Fax: +66-43-202373

**Table S1.** Comparison of pollutant degradation by using various photocatalysts

| Photocatalyst                                                     | Pollutants | Conc.                | Catalyst loading | Light source | Lamp                | Time (min) | Degradation (%) | Ref.      |
|-------------------------------------------------------------------|------------|----------------------|------------------|--------------|---------------------|------------|-----------------|-----------|
| BiOBr                                                             | NOR        | 20 mgL <sup>-1</sup> | 50 mg            | -            | -                   | 180        | 97.2            | [1]       |
| BiOBr-Bi                                                          | NOR        | 20 mgL <sup>-1</sup> | 50 mg            | Visible      | 500 W xenon lamp    | 180        | 97.2            | [2]       |
| Bi/BiOBr/CdS                                                      | NOR        | 20 mgL <sup>-1</sup> | 50 mg            | Visible      | 500 W xenon lamp    | 180        | 97.4            | [3]       |
| BiOBr UiO-66-NH <sub>2</sub>                                      | NOR        | 10 mgL <sup>-1</sup> | 15 mg            | Visible      | 500 W xenon lamp    | 180        | 93.6            | [4]       |
| CoFe <sub>2</sub> O <sub>4</sub> -rGO-BiOBr                       | NOR        | 5 mgL <sup>-1</sup>  | 25 mg            | Visible      | Mercury lamp        | 40         | 88.7            | [5]       |
| BiOBr/β-Bi <sub>2</sub> O <sub>3</sub>                            | NOR        | 20 mgL <sup>-1</sup> | 50 mg            | Solar        | 500 W xenon lamp    | 60         | 70.0            | [6]       |
| BiOI                                                              | NOR        | 10 mgL <sup>-1</sup> | 50 mg            | Sunlight     | -                   | 240        | 78.1            | This work |
| WO <sub>3</sub>                                                   | RhB        | 40 mgL <sup>-1</sup> | 50 mg            | Visible      | 500 W xenon lamp    | 100        | 92.8            | [7]       |
| Cs <sub>3</sub> PW <sub>12</sub> O <sub>40</sub> /WO <sub>3</sub> | RhB        | 40 mgL <sup>-1</sup> | 60 mg            | Visible      | 55 W xenon lamp     | 30         | 100             | [8]       |
| Ag/Ag <sub>3</sub> PO <sub>4</sub> /WO <sub>3</sub>               | RhB        | 10 mgL <sup>-1</sup> | 20 mg            | Visible      | 300 W xenon lamp    | 120        | 100             | [9]       |
| CdS/AgBr-rGO                                                      | RhB        | 5 mgL <sup>-1</sup>  | 60 mg            | Visible      | 500 W xenon lamp    | 60         | 95.8            | [10]      |
| Ag/AgBr/ZnO                                                       | RhB        | 5 mgL <sup>-1</sup>  | 100 mg           | Visible      | 300 W Tungsten lamp | 180        | 100             | [11]      |
| BiOI                                                              | RhB        | 10 mgL <sup>-1</sup> | 50 mg            | Sunlight     | -                   | 60         | 100             | This work |

## References

- [1] Z. Gao, B. Yao, T. Xu, Comparative study on photocatalytic material activity of BiOBr flower microspheres and sheet structure, Environ. Technol. (2019) 1–11. <https://doi.org/10.1080/09593330.2019.1670268>.

- [2] Z. Gao, B. Yao, F. Yang, T. Xu, Y. He, Preparation of BiOBr-Bi heterojunction composites with enhanced photocatalytic properties on BiOBr surface by in-situ reduction, *Mater. Sci. Semicond. Process.* 108 (2020) 104882. <https://doi.org/10.1016/j.mssp.2019.104882>.
- [3] Z. Gao, B. Yao, T. Xu, M. Ma, Effect and study of reducing agent NaBH<sub>4</sub> on Bi/BiOBr/CdS photocatalyst, *Mater. Lett.* 259 (2020) 126874. <https://doi.org/10.1016/j.matlet.2019.126874>.
- [4] Z. Yang, X. Tong, J. Feng, S. He, M. Fu, X. Niu, T. Zhang, H. Liang, A. Ding, X. Feng, Flower-like BiOBr/UiO-66-NH<sub>2</sub> nanosphere with improved photocatalytic property for norfloxacin removal, *Chemosphere.* 220 (2019) 98–106. <https://doi.org/10.1016/J.CHEMOSPHERE.2018.12.086>.
- [5] R. Zhang, Y. Li, Q. Han, T. Zhang, Y. Liu, K. Zeng, C. Zhao, Investigation the High Photocatalytic Activity of Magnetically Separable Graphene Oxide Modified BiOBr Nanocomposites for Degradation of Organic Pollutants and Antibiotic, *J. Inorg. Organomet. Polym. Mater.* 30 (2020) 1703–1715. <https://doi.org/10.1007/s10904-019-01333-7>.
- [6] M. Xu, M. Ye, X. Zhou, J. Cheng, C. Huang, W. Wong, Z. Wang, Y. Wang, C. Li, One-pot controllable synthesis of BiOBr/ $\beta$ -Bi<sub>2</sub>O<sub>3</sub> nanocomposites with enhanced photocatalytic degradation of norfloxacin under simulated solar irradiation, *J. Alloys Compd.* 816 (2020) 152664. <https://doi.org/10.1016/J.JALLCOM.2019.152664>.
- [7] G. Palanisamy, K. Bhuvaneswari, T. Pazhanivel, G. Bharathi, Enriched photocatalytic activity of Rhodamine B dye from aqueous solution using hollow sphere tungsten trioxide
- [8] N. Tahmasebi, S. Mirzavand, A. Hakimyfar, S. Barzegar, The excellent photocatalytic activity of novel Cs<sub>3</sub>PW<sub>12</sub>O<sub>40</sub>/WO<sub>3</sub> composite toward the degradation of rhodamine B, *Adv. Powder Technol.* 30 (2019) 257–265.

- [10] J. Zhang, Z. Zhang, W. Zhu, X. Meng, Boosted photocatalytic degradation of Rhodamine B pollutants with Z-scheme CdS/AgBr-rGO nanocomposite, *Appl. Surf. Sci.* 502 (2020) 144275.
- [9] Q. Li, F. Wang, Y. Hua, Y. Luo, X. Liu, G. Duan, X. Yang, Deposition-precipitation preparation of Ag/Ag<sub>3</sub>PO<sub>4</sub>/WO<sub>3</sub> nanocomposites for efficient Visible-light degradation of rhodamine B under strongly acidic/alkaline conditions, *J. Colloid Interface Sci.* 506 (2017) 207–216.
- [11] L. Shi, L. Liang, J. Ma, Y. Meng, S. Zhong, F. Wang, J. Sun, Highly efficient visible light-driven Ag/AgBr/ZnO composite photocatalyst for degrading Rhodamine B, *Ceram. Int.* 40 (2014) 3495–3502.
